# Supplementary material for: 25-Hydroxyvitamin D status is associated with interleukin-6 methylation in adipose tissue from patients with colorectal cancer
Source: Royal Society of Chemistry journal article supplement (doi:10.1039/d1fo01371h), 2021-01-01
Supplement: d1fo01371h2.pdf [file d1fo01371h2.pdf]

**Supplementary Table 1.** Gene list.

| <b>Gene</b>                                    | <b>Abbreviation</b>            | <b>Reference</b>  | <b>RefSeq.</b> |
|------------------------------------------------|--------------------------------|-------------------|----------------|
| C-C motif chemokine ligand 2                   | <i>CCL2</i>                    | Hs.PT.58.45467977 | NM_002982      |
| Interleukin 1 beta                             | <i>IL1<math>\beta</math></i>   | Hs.PT.58.1518186  | NM_000576      |
| Interleukin 6                                  | <i>IL6</i>                     | Hs.PT.58.40226675 | NM_000600      |
| Interleukin 10                                 | <i>IL10</i>                    | Hs.PT.58.2807216  | NM_000572      |
| Interferon gamma                               | <i>IFN<math>\gamma</math></i>  | Hs.PT.58.3781960  | NM_000619      |
| Tumor necrosis factor alpha                    | <i>TNF<math>\alpha</math></i>  | Hs.PT.58.45380900 | NM_000594      |
| Nuclear factor kappa B subunit 1               | <i>NF<math>\kappa</math>B1</i> | Hs.PT.58.20344216 | NM_001165412   |
| Cytochrome P450 family 24 subfamily A member 1 | <i>CYP24A1</i>                 | Hs.PT.58.3820691  | NM_000782      |
| Cytochrome P450 family 27 subfamily B member 1 | <i>CYP27B1</i>                 | Hs.PT.58.38667884 | NM_000785      |
| Retinoid X receptor alpha                      | <i>RXR<math>\alpha</math></i>  | Hs.PT.58.3784663  | NM_002957      |
| Vitamin D receptor                             | <i>VDR</i>                     | Hs.PT.58.20635582 | NM_000376      |
| DNA methyltransferase type 3A                  | <i>DNMT3A</i>                  | Hs00602456_m1     | NM_001320892.1 |
| Peptidylprolyl isomerase A                     | <i>PPIA</i>                    | 4326316E          | NM_021130.3    |
