# Supplementary material for: 25-Hydroxyvitamin D status is associated with interleukin-6 methylation in adipose tissue from patients with colorectal cancer
Source: Royal Society of Chemistry journal article supplement (doi:10.1039/d1fo01371h), 2021-01-01
Supplement: d1fo01371h3.pdf [file d1fo01371h3.pdf]

**Supplementary Table 2.** Primer list

| <b>Gene name</b>                                 | <b>Abbreviation<br/>gene name</b> | <b>Forward primer<br/>sequence</b> | <b>Reverse primer<br/>sequence</b> | <b>Sequencing primer<br/>sequence</b> |
|--------------------------------------------------|-----------------------------------|------------------------------------|------------------------------------|---------------------------------------|
| long-<br>interspersed<br>nucleotide<br>element-1 | <i>LINE-1</i>                     | AGGGAGTGTTAGAT<br>AGTGG            | AACTCCCTAACC<br>CCTTAC             | CAAATAAAACAATACC<br>TC                |
