# Supplementary material for: 25-Hydroxyvitamin D status is associated with interleukin-6 methylation in adipose tissue from patients with colorectal cancer
Source: Royal Society of Chemistry journal article supplement (doi:10.1039/d1fo01371h), 2021-01-01
Supplement: d1fo01371h5.pdf [file d1fo01371h5.pdf]

| Probe                          | Distance to transcription start site | Region   |
|--------------------------------|--------------------------------------|----------|
| <b>CCL2</b>                    |                                      |          |
| cg21109025                     | 1368                                 | Promoter |
| cg05440824                     | 1202                                 | Promoter |
| cg04633676                     | 1017                                 | Promoter |
| cg12698626                     | 771                                  | Promoter |
| cg11640275                     | 109                                  | Promoter |
| cg26079699                     | -28                                  | Promoter |
| cg16700758                     | -122                                 | Promoter |
| cg11860203                     | -279                                 | Body     |
| cg17864156                     | -591                                 | Body     |
| <b>IL1<math>\beta</math></b>   |                                      |          |
| cg14117934                     | -6805                                | Body     |
| cg15836722                     | -695                                 | Body     |
| cg01290568                     | -621                                 | Body     |
| cg20157753                     | -137                                 | Promoter |
| cg07935264                     | -105                                 | Promoter |
| cg18773937                     | 131                                  | Promoter |
| cg23149881                     | 174                                  | Promoter |
| cg02596281                     | 1134                                 | Promoter |
| cg18635064                     | 1336                                 | Promoter |
| <b>IL6</b>                     |                                      |          |
| cg09840472                     | 1106                                 | Promoter |
| cg17067544                     | 182                                  | Promoter |
| cg01770232                     | -652                                 | Body     |
| cg26061582                     | -706                                 | Body     |
| cg05472934                     | -1154                                | Body     |
| cg00087425                     | -1326                                | Body     |
| cg15703690                     | -1489                                | Body     |
| cg13104385                     | -1881                                | Body     |
| cg05265849                     | -1887                                | Body     |
| cg07998387                     | -2068                                | Body     |
| cg02335517                     | -2935                                | Body     |
| <b>IL10</b>                    |                                      |          |
| cg14789529                     | -4375                                | Body     |
| cg15096505                     | -2273                                | Body     |
| cg17067005                     | -493                                 | Body     |
| cg10978799                     | 85                                   | Promoter |
| cg17744604                     | 327                                  | Promoter |
| cg14180511                     | 348                                  | Promoter |
| <b>IFN<math>\alpha</math>1</b> |                                      |          |
| cg15669228                     | -33                                  | Promoter |
| <b>IFN<math>\gamma</math></b>  |                                      |          |
| cg01281450                     | -4757                                | Body     |
| cg01940810                     | -1872                                | Body     |
| cg00848007                     | -131                                 | Promoter |
| cg26227465                     | 50                                   | Promoter |
| cg05224770                     | 292                                  | Promoter |
| <b>NF<math>\kappa</math>B</b>  |                                      |          |
| cg01983105                     | 1262                                 | Promoter |
| cg07830103                     | 436                                  | Promoter |
| cg10189525                     | 290                                  | Promoter |
| cg24880057                     | 240                                  | Promoter |
| cg03464689                     | 57                                   | Promoter |
| cg06003169                     | 26                                   | Promoter |
| cg00119197                     | -488                                 | Body     |
| cg05490963                     | -660                                 | Body     |
| cg01137708                     | -882                                 | Body     |
| cg15409712                     | -3802                                | Body     |

|              |         |            |
|--------------|---------|------------|
| cg05343713   | -36217  | Body       |
| cg04799232   | -53347  | Body       |
| cg25663524   | -66809  | Body       |
| cg23885005   | -98151  | Body       |
| cg25905215   | -115372 | Body       |
| TNF $\alpha$ |         |            |
| cg14910524   | 1396    | Promoter   |
| cg27531490   | 885     | Promoter   |
| cg24452282   | 604     | Promoter   |
| cg11484872   | 175     | Promoter   |
| cg21370522   | 125     | Promoter   |
| cg01569083   | 55      | Promoter   |
| cg03037030   | 44      | Promoter   |
| cg12681001   | -196    | First Exon |
| cg04425624   | -221    | First Exon |
| cg21467614   | -294    | First Exon |
| cg08553327   | -303    | First Exon |
| cg26729380   | -311    | First Exon |
| cg10650821   | -342    | First Exon |
| cg17741993   | -1350   | Body       |
| cg01360627   | -1587   | Body       |
| cg23384708   | -1590   | Body       |
| cg20477259   | -1616   | Body       |
| cg09637172   | -1908   | Body       |
| cg05952498   | -1913   | Body       |
| cg15989608   | -1977   | Body       |
| cg26736341   | -1998   | Body       |
| cg04472685   | -2129   | Body       |
| cg19124225   | -2492   | Body       |
| cg02137984   | -2554   | Body       |
| cg06825478   | -2723   | Body       |
| cg17755321   | -2741   | Body       |
