# Supplementary material for: 25-Hydroxyvitamin D status is associated with interleukin-6 methylation in adipose tissue from patients with colorectal cancer
Source: Royal Society of Chemistry journal article supplement (doi:10.1039/d1fo01371h), 2021-01-01
Supplement: d1fo01371h6.pdf [file d1fo01371h6.pdf]

**Supplementary Table 5.** An ANCOVA model testing whether there is an interaction effect of age and HOMA-IR in DNA methylation

| Variables      | Age interaction |                         |                | HOMA-IR interaction                     |                         |                    |                                             |
|----------------|-----------------|-------------------------|----------------|-----------------------------------------|-------------------------|--------------------|---------------------------------------------|
|                | DNA methylation | Case/control<br>F value | Age<br>F value | Case/control*age interaction<br>F value | Case/control<br>F value | HOMA-IR<br>F value | Case/control*HOMA-IR interaction<br>F value |
| <i>CCL2</i>    |                 | 0.909                   | 1.769          | 0.716                                   | 2.081                   | 0.592              | 3.529                                       |
| <i>IL1β</i>    |                 | 18.529*                 | 1.225          | 0.300                                   | 6.935*                  | 0.025              | 0.022                                       |
| <i>IL6</i>     |                 | 33.053*                 | 1.228          | 0.030                                   | 18.386*                 | 0.136              | 0.130                                       |
| <i>IL10</i>    |                 | 25.517*                 | 2.024          | 0.069                                   | 5.677*                  | 0.068              | 0.044                                       |
| <i>IFNα1</i>   |                 | 7.125*                  | 0.074          | 0.454                                   | 3.938                   | 0.130              | 0.000                                       |
| <i>IFNγ</i>    |                 | 0.380                   | 0.122          | 0.035                                   | 0.038                   | 0.223              | 0.092                                       |
| <i>NFκB1</i>   |                 | 15.287*                 | 1.355          | 0.190                                   | 4.877*                  | 0.123              | 0.001                                       |
| <i>TNFα</i>    |                 | 6.349*                  | 6.565*         | 1.002                                   | 0.989                   | 0.026              | 2.188                                       |
| <i>CYP24A1</i> |                 | 1.916                   | 1.932          | 0.052                                   | 8.491*                  | 0.472              | 8.627*                                      |
| <i>CYP27B1</i> |                 | 5.012                   | 1.448          | 1.300                                   | 4.492                   | 0.008              | 0.656                                       |
| <i>VDR</i>     |                 | 2.463                   | 0.889          | 0.001                                   | 0.019                   | 0.024              | 0.401                                       |
| <i>RXRα</i>    |                 | 7.052*                  | 1.988          | 0.081                                   | 1.837                   | 0.812              | 0.047                                       |

A multivariate regression model using ANCOVA analysis, taking DNA methylation as response variable, CRC as predictor variable and age and HOMA-IR as covariates. There was also taking into account the interaction between predictor variable and covariates. F value is a value on the F distribution, which means variation between means and variation within the samples. Significant interaction is noted as an asterisk ( $p < 0.05$ ).

Abbreviation: ANCOVA, analysis of covariance, CRC, colorectal cancer, HOMA-IR, homeostatic model assessment of insulin resistance, CCL2, C-C motif chemokine ligand 2, CYP24A1, cytochrome P450 family 24 subfamily A member 1, CYP27B1, cytochrome P450 family 27 subfamily B member 1, IL1β, interleukin 1 beta, IL6, interleukin 6, IL10, interleukin 10, IFNα1, interferon alpha 1, IFNγ, interferon gamma, NFκB1, nuclear factor kappa B 1, TNFα, tumor necrosis factor alpha, RXRα, retinoid X receptor alpha, VDR, vitamin D receptor
