# Supplementary material for: 25-Hydroxyvitamin D status is associated with interleukin-6 methylation in adipose tissue from patients with colorectal cancer
Source: Royal Society of Chemistry journal article supplement (doi:10.1039/d1fo01371h), 2021-01-01
Supplement: d1fo01371h7.pdf [file d1fo01371h7.pdf]

| Probe          | Distance to transcription start site | Region   |
|----------------|--------------------------------------|----------|
| <b>CYP24A1</b> |                                      |          |
| cg24849555     | -9325                                | Body     |
| cg01462727     | -4189                                | Body     |
| cg24582168     | -866                                 | Body     |
| cg12978433     | -556                                 | Promoter |
| cg23685712     | -449                                 | Promoter |
| cg18956481     | -373                                 | Promoter |
| cg02143877     | -371                                 | Promoter |
| cg02604290     | 77                                   | Promoter |
| cg03307911     | 89                                   | Promoter |
| cg05120028     | 200                                  | Promoter |
| cg02712555     | 221                                  | Promoter |
| cg02673418     | 466                                  | Promoter |
| cg17997279     | 960                                  | Promoter |
| <b>CYP27B1</b> |                                      |          |
| cg18787440     | -4096                                | Body     |
| cg19794395     | -2585                                | Body     |
| cg07060721     | -2341                                | Body     |
| cg23101118     | -1990                                | Body     |
| cg16984335     | -1827                                | Body     |
| cg24110768     | -1400                                | Body     |
| cg01182309     | -1186                                | Body     |
| cg04321714     | -879                                 | Body     |
| cg06883848     | -457                                 | Body     |
| cg24722099     | -35                                  | Promoter |
| cg04905829     | 33                                   | Promoter |
| cg20372759     | 1409                                 | Promoter |
| cg25452172     | 1873                                 | Promoter |
| <b>VDR</b>     |                                      |          |
| cg21843272     | -63076                               | Body     |
| cg14854850     | -61053                               | Body     |
| cg10592901     | -53586                               | Body     |
| cg19008693     | -27941                               | Body     |
| cg10037049     | -22172                               | Body     |
| cg02714932     | -11613                               | Body     |
| cg02547054     | -2168                                | Body     |
| cg14311020     | -183                                 | Body     |
| cg27537561     | -149                                 | Body     |
| cg10195011     | -7                                   | Promoter |
| cg13865595     | 119                                  | Promoter |
| cg23654431     | 162                                  | Promoter |
| cg02522757     | 187                                  | Promoter |
| cg03137447     | 484                                  | Promoter |
| cg06369854     | 508                                  | Promoter |
| cg16321474     | 581                                  | Promoter |
| cg13556224     | 995                                  | Promoter |
| cg02470587     | 3386                                 | Promoter |
| cg22833603     | 5822                                 | Promoter |
| cg20731937     | 37359                                | Promoter |
| cg26333618     | 37850                                | Promoter |
| <b>RXR</b>     |                                      |          |
| cg13746518     | -123297                              | Body     |
| cg13061648     | -122373                              | Body     |
| cg13425135     | -121626                              | Body     |
| cg24164254     | -120397                              | Body     |
| cg14344989     | -120293                              | Body     |
| cg13413384     | -93287                               | Body     |
| cg14051721     | -92365                               | Body     |

|            |        |          |
|------------|--------|----------|
| cg13005613 | -92173 | Body     |
| cg21215436 | -91967 | Body     |
| cg00545196 | -90741 | Body     |
| cg14654324 | -90492 | Body     |
| cg13865488 | -90341 | Body     |
| cg00753924 | -89869 | Body     |
| cg14545975 | -88269 | Body     |
| cg13487983 | -87375 | Body     |
| cg14265220 | -84384 | Body     |
| cg14154547 | -84365 | Body     |
| cg13595495 | -70468 | Body     |
| cg14051662 | -70236 | Body     |
| cg13931640 | -68875 | Body     |
| cg13847322 | -63822 | Body     |
| cg13941235 | -61242 | Body     |
| cg14121282 | -59130 | Body     |
| cg14468605 | -46722 | Body     |
| cg13677043 | -44105 | Body     |
| cg14236758 | -43185 | Body     |
| cg02127980 | -43172 | Body     |
| cg21201924 | -42881 | Body     |
| cg02059519 | -41991 | Body     |
| cg13687497 | -40895 | Body     |
| cg14570632 | -34648 | Body     |
| cg14462321 | -23428 | Body     |
| cg02319187 | -20963 | Body     |
| cg04875697 | -19598 | Body     |
| cg13510651 | -18828 | Body     |
| cg13689699 | -16367 | Body     |
| cg16408394 | -10131 | Body     |
| cg13978325 | -9344  | Body     |
| cg09800519 | -9342  | Body     |
| cg14204281 | -8529  | Body     |
| cg24341498 | -8446  | Body     |
| cg13936846 | -7120  | Body     |
| cg04329455 | -6420  | Body     |
| cg14651936 | 1438   | Promoter |
