# Supplementary figures and images for: 25-Hydroxyvitamin D status is associated with interleukin-6 methylation in adipose tissue from patients with colorectal cancer
Source: Royal Society of Chemistry journal article supplement (doi:10.1039/d1fo01371h), 2021-01-01

**A**

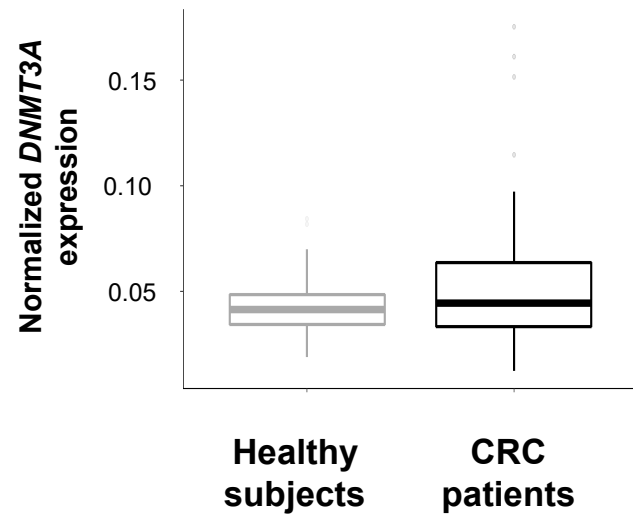

**B**

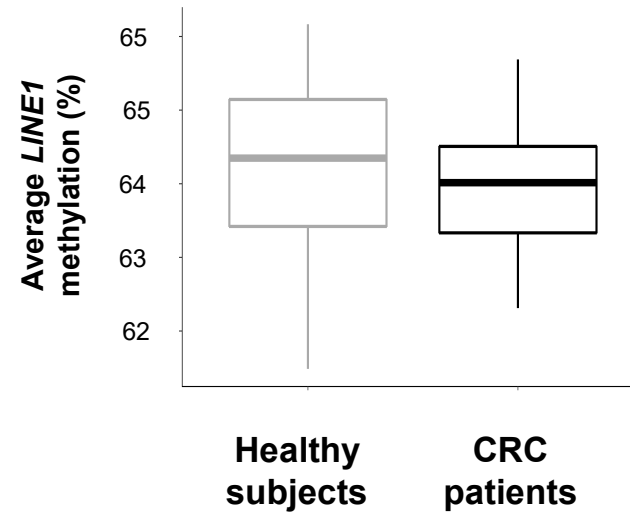

**C**

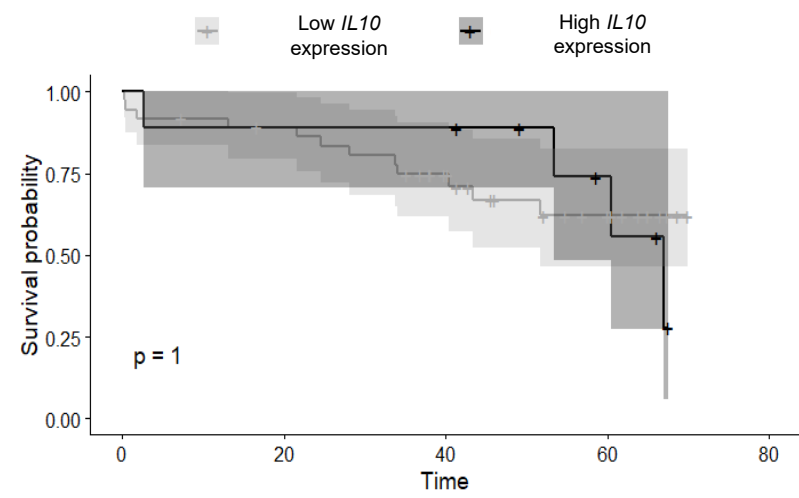

**D**

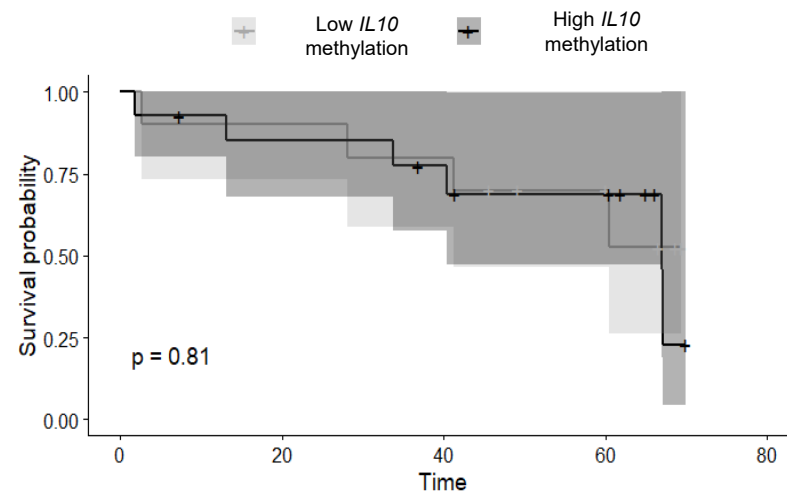

Supplement: d1fo01371h1.pdf [file d1fo01371h1.pdf]
